1       **Genetic diversity of tilapia lake virus genome segment 1 from 2011 to 2019**  
2                   **and a newly validated semi-nested RT-PCR method**

3           Suwimon Taengphu<sup>1,2</sup>, Pakkakul Sangsuriya<sup>2,3</sup>, Kornsunee Phiwsaiya<sup>1,2</sup>, Partho Pratim  
4   Debnath<sup>4</sup>, Jerome Delamare-Deboutteville<sup>5</sup>, Chadag Vishnumurthy Mohan<sup>5</sup>, Ha Thanh Dong<sup>1,6\*</sup>,  
5                                   Saengchan Senapin<sup>1,2\*</sup>

6   <sup>1</sup>Fish Health Platform, Center of Excellence for Shrimp Molecular Biology and Biotechnology  
7   (Centex Shrimp), Faculty of Science, Mahidol University, Bangkok, Thailand

8   <sup>2</sup>National Center for Genetic Engineering and Biotechnology (BIOTEC), National Science and  
9   Technology Development Agency (NSTDA), Pathum Thani, Thailand

10   <sup>3</sup>Aquatic Molecular Genetics and Biotechnology Laboratory, BIOTEC, NSTDA, Pathum Thani,  
11   Thailand

12   <sup>4</sup>WorldFish, Dhaka, Bangladesh

13   <sup>5</sup>WorldFish, Penang, Malaysia

14   <sup>6</sup>Faculty of Science and Technology, Suan Sunandha Rajabhat University, Bangkok, Thailand

15

16

17   **Running title:** Diversity of TiLV segment 1 and a new PCR protocol

18   \*Corresponding authors:

19   S. Senapin (E-mail: saengchan@biotec.or.th)

20   H.T. Dong (Email: hathanh.do@ssru.ac.th)

## 21 **Abstract**

22 The gene of RNA viruses, encoding RNA-directed RNA polymerase (RdRp) is relatively  
23 conserved due to its crucial function in viral genome replication and transcription making it a  
24 useful target for genetic diversity study and PCR detection. In this study, we investigated the  
25 genetic diversity of 21 tilapia lake virus (TiLV) genome segment 1 sequences predictively coding  
26 for RdRp subunit P1. Those sequences were obtained from infected fish samples collected in  
27 Ecuador, Israel, Peru, and Thailand between 2011 and 2019 (nine sequences from this study and  
28 12 sequences from GenBank). Primers were then designed from the highly conserved regions  
29 among all 21 TiLV segment 1 sequences and used in semi-nested RT-PCR condition optimization.  
30 The result revealed that all 21 TiLV segment 1 sequences showed 95.00-99.94 and 99.00-100%  
31 nucleotide and amino acid sequence identity, respectively. These isolates were phylogenically  
32 clustered into three separate genetic clades, called i) Israeli-2011 clade (containing of TiLV  
33 isolates from Israel collected in 2011, Ecuador, and Peru isolates), ii) monophyletic Israel-2012  
34 clade (containing only TiLV isolates collected from Israel in 2012), and iii) Thai clade (containing  
35 only sequences obtained from Thailand isolates). The newly established PCR protocol was 100  
36 times more sensitive than our previous segment 3-based protocol when comparatively assayed  
37 with RNA extracted from infected fish. The assay was also shown to be specific when tested  
38 against negative control samples, i.e. RNA extracted from clinical healthy tilapia and from  
39 bacterial and viral pathogens (other than TiLV) commonly found in aquatic animals. Validation  
40 experiment with RNA extracted from naturally infected fish specimens collected in 2013-2019  
41 yielded positive test results for all samples tested, confirming that our newly designed primers and  
42 detection protocol against TiLV segment 1, have a potential application for detection of all current  
43 genetic variants of TiLV.

44 **Keywords:** detection, semi-nested PCR, tilapia lake virus, TiLV, genome

## 45 **Introduction**

46 A novel disease termed syncytial hepatitis of tilapia (SHT) associated with high mortality in  
47 farmed tilapia (Ferguson et al. 2014) caused by Tilapia lake virus (TiLV) (Eyngor et al. 2014).  
48 TiLV is a segmented RNA virus that has been taxonomically assigned to *Tilapia Tilapinevirus*  
49 (Bacharach et al. 2016; Adams et al. 2017). TiLV has been reported in 16 tilapia farming countries  
50 and this is likely to increase due to some underreporting (Jansen et al. 2018; Pulido et al. 2019).  
51 Rapid and accurate detection of the virus is crucial for selection of TiLV-free fish broodstock in  
52 view of the vertical transmission possibilities of the virus from parents to offspring (Yamkasem et  
53 al. 2019; Dong et al. 2020) and to prevent disease spread through movement of live fish for  
54 aquaculture (Dong et al. 2017a; Jansen et al. 2018). Following the characterization of the TiLV  
55 genomes (Eyngor et al. 2014; Bacharach et al. 2016), several PCR methods have been published,  
56 including RT-PCR (Eyngor et al. 2014), nested RT-PCR (Kembou Tsofack et al. 2017), semi-  
57 nested RT-PCR (Dong et al. 2017b), RT-qPCR (Kembou Tsofack et al. 2017; Tattiyapong et al.  
58 2018; Waiyamitra et al. 2018), and RT-LAMP (Phusantisampan et al. 2019; Yin et al. 2019). Most  
59 of the aforementioned methods used genome segment 3 of TiLV as the target for primer design.  
60 There are insufficient information and understanding on genetic diversity and functional role of  
61 segment 3. Due to the nature of RNA viruses, we hypothesized that there was a certain level of  
62 sequence variation in the TiLV genomes. If so, there might be a possibility for mismatches of the  
63 designed primers and thus the current molecular detection methods may not be applicable for all  
64 genetic variants, if any, of TiLV.

65 So far, the functions of the putative protein products of the 10 genomic segments of TiLV have  
66 not been elucidated, except for the sequence of segment 1, that has weak percent identity (~17%  
67 amino acid identity, 37% sequence coverage) to the *PB1* gene of influenza C virus (Bacharach et  
68 al. 2016). Influenza virus *PB1* gene encodes for RNA-directed RNA polymerase (RdRp) catalytic  
69 subunit sometimes called polymerase basic protein 1 or RNA-directed RNA polymerase subunit  
70 P1. Generally, sequences encoding the *RdRp* genes of RNA viruses show a reasonably high level  
71 of conservation due to their crucial replication and transcription functions. *RdRp* gene was  
72 therefore considered a useful molecular marker for virus classification and detection (Koonin and  
73 Dolja 1993; Culley et al. 2003; Culley and Steward 2007; Senapin et al. 2007). Therefore, this  
74 study aims to i) investigate the genetic diversity of TiLV genome segment 1 from TiLV-infected  
75 fish samples and sequences available from GenBank and ii) to develop a new semi-nested RT-

76 PCR method based on primers designed from highly conserved regions of TiLV genome segment  
77 1 for disease diagnosis and surveillance.

## 78 **Materials and methods**

### 79 **Fish samples and RNA preparation**

80 For amplification of TiLV genome segment 1, nine TiLV-infected specimens obtained from years  
81 2013 to 2019 were used. They were archived specimens from our previous works (Dong et al.  
82 2017a; Dong et al. 2017b) and a newly collected set (Table 1). Suspected TiLV-infected fish and  
83 experimentally challenged fish samples (Table 2) were subjected to TiLV diagnosis using the  
84 newly developed semi-nested RT-PCR described below. RNA was extracted from the fish tissues  
85 using Trizol reagent (Invitrogen) following protocols recommended by the manufacturer. Quality  
86 and quantity of the obtained RNA was measured by spectrophotometry at 260 and 280 nm. RNA  
87 extracted from clinically healthy red and Nile tilapia tested negative for TiLV were used in  
88 negative control PCR reactions.

### 89 **Amplification of TiLV genomic segment 1**

90 Primers used for amplification of the putative open reading frame (ORF) of TiLV genomic  
91 segment 1 were TiLV-S1-F; 5'-ATG TGG GCA TTT CAA GAA-3' and TiLV-S1-R; 5'-TTA  
92 GCA CCC AGC GGT GGG CT-3' as previously described by Pulido et al. 2019. They were  
93 designed based on the segment 1 sequence of the TiLV Israeli isolate TiL-4-2011 (accession  
94 number KU751814, Eyngor et al, 2014, Bacharach et al, 2016). RNA extracted from 9 TiLV-  
95 infected fish specimens obtained as described above were individually used as template. RT-PCR  
96 reaction of 25 µl composed of 200 ng RNA template, 300 nM of each primer, 1 µl of SuperScript  
97 III RT/Platinum Taq Mix (Invitrogen), and 1x supplied buffer (containing 0.2 mM of each dNTP,  
98 2.6 mM MgSO<sub>4</sub>, and stabilizers). Amplification profiles consisted of a reverse transcription step  
99 at 50 °C for 30 min; 35 cycles of 94 °C for 30 s, 55 °C for 30 s, and 72 °C for 1.5 min; and a final  
100 extension step at 72 °C for 5 min. After agarose gel electrophoresis, expected 1,560 bp amplicons  
101 obtained from each of the nine reactions were removed from the gel, purified and cloned into  
102 pGEM-T easy vector (Promega). Recombinant clones were then sent to Macrogen (South Korea)  
103 for DNA sequencing using T7 promoter and SP6 promoter primers.

104

## 105 **DNA sequence analysis**

106 A total of 21 TiLV segment 1 sequences listed in Table 1 were used for comparison and  
107 phylogenetic relationship analysis. Nine sequences were obtained from the present study and other  
108 12 sequences were retrieved from the GenBank database. Multiple sequence alignments were  
109 performed using MEGA 7 (Kumar et al. 2016) and a consensus sequence of 1,559 nucleotide  
110 residues out of the putative 1,560 nucleotide-ORF segment 1 were obtained. Deduced amino  
111 sequences of 519 nucleotide residues were translated from these consensus TiLV segment 1 using  
112 ExPASy translate tool and then used for sequence comparison. Putative PB domain of the  
113 translated sequences was predicted using InterPro database (<https://www.ebi.ac.uk/interpro/>).  
114 Phylogenetic tree based on TiLV segment 1 nucleotide sequences was constructed using  
115 Maximum-Likelihood with GTR+G (General Time Reversible model + Gamma distributed)  
116 method as suggested by a best model feature of the MEGA 7 program. An ORF coding for a  
117 putative *PBI* of influenza virus C isolate Ann Arbor 1950 (NC\_006308) was used as outgroup.  
118 Pairwise distance analysis was also conducted using MEGA 7.

## 119 **Development of a new semi-nested RT-PCR method based on segment 1**

120 In this study, a new semi-nested RT-PCR detection of TiLV was developed. Primers were designed  
121 from the highly conserved regions from the multiple sequence alignments of the 21 sequences of  
122 TiLV segment 1. These sequences derived from TiLV isolates collected from the period from 2011  
123 to 2019 (Table 1). Primer specificity was initially confirmed *in silico* with the NCBI primer-blast  
124 tool. Primers TiLV/nSeg1F; 5'- TCT GAT CTA TAG TGT CTG GGC C-3' and TiLV/nSeg1R;  
125 5'- AGT CAT GCT CGC TTA CAT GGT-3' with an expected amplified product of 620 bp were  
126 used in the first round RT-PCR. Primers TiLV/nSeg1F and TiLV/nSeg1RN; 5'- CCA CTT GTG  
127 ACT CTG AAA CAG -3' with an expected product of 274 bp were employed in the second round  
128 PCR. Amplification conditions such as annealing temperature, number of cycles, buffer and primer  
129 concentration were evaluated to obtain optimized conditions. Consequently, the first RT-PCR  
130 reaction of 25 µl composed of 200 ng of RNA template, 400 nM of each primer, 0.5 µl of  
131 SuperScript III RT/Platinum Taq Mix (Invitrogen), and 1x of supplied buffer. Amplification  
132 profiles consisted of a reverse transcription step at 50 °C for 30 min; a denaturation step at 94 °C  
133 for 2 min, 30 PCR cycles of 94 °C for 30 s, 60 °C for 30 s, and 72 °C for 30 s; and a final extension  
134 step at 72 °C for 2 min. Positive control consisted of a reaction containing RNA extracted from

135 TiLV-infected red tilapia as template while no template added in the negative control. 5 µl of  
136 product from the first round PCR was then used as template in the second round PCR reaction of  
137 25 µl containing 500 nM of primer TiLV/nSeg1F, 600 nM of primer TiLV/nSeg1RN, 0.16 mM of  
138 each dNTP, 0.8 mM MgCl<sub>2</sub>, 1 unit of Platinum Taq DNA polymerase (Invitrogen), and 1.2x  
139 supplied buffer. Thermocycling conditions consisted of a 5 min initial denaturation step at 94 °C  
140 followed by 30 thermocycles and a final extension step described above. 10 µl of the amplified  
141 products were analyzed by 1.5% agarose gel electrophoresis stained with ethidium bromide or  
142 RedSafe DNA staining dye.

### 143 **Validation of TiLV segment 1 semi-nested RT-PCR assay**

144 Detection specificity of the assay was performed with RNA extracted from common viral and  
145 bacterial pathogens found in aquatic animals as listed in Table 3. Viral infected fish tissues were  
146 subjected to RNA extraction using Trizol reagent as mentioned above. For bacterial RNA isolation,  
147 each bacterial strain was cultured in appropriated broth medium of 5 mL overnight at 30 °C with  
148 shaking at 200 rpm. After centrifugation, bacterial cell pellets were washed once with nuclease-  
149 free water and homogenized with Trizol reagent followed by the manufacturer's protocol.  
150 Detection sensitivity of the TiLV segment 1 protocol (this study) was performed by comparison  
151 with our previous semi-nested PCR protocol targeting TiLV segment 3 (Dong et al. 2017b). This  
152 was done using serially diluted RNA template extracted from 3 individual TiLV-infected fish. Two  
153 fish samples were assayed by Centex Shrimp in Thailand while another by WorldFish Khulna  
154 laboratory, Bangladesh. The newly established semi-nested RT-PCR protocol was then employed  
155 to screen for TiLV infection in both clinically healthy and clinically sick fish samples, including  
156 representative from archived samples as well as naturally and experimentally infected fish (Tables  
157 1 and 2).

158

## 159 **Results**

### 160 **Genome segment 1 based phylogenetic relationship of TiLV isolates**

161 After amplification of TiLV genome segment 1 from the nine TiLV-infected tilapia, their  
162 sequences were compared to that of 12 sequences retrieved from the GenBank database.  
163 Consequently, 21 TiLV segment 1 sequences obtained from samples collected in 2011 to 2019

164 were used for phylogenetic analysis. The results showed that the TiLV segment 1 sequences were  
165 clustered into three separate clades namely Israeli-2011 clade, Israeli-2012 clade, and Thai clade  
166 while the *RdRp PBI* sequence of influenza C virus used as an outgroup diverged into another  
167 lineage (Fig. 1). The Thai clade comprised all studied isolates from Thailand was closely related to  
168 the monophyletic Israel-2012 clade, whereas Israeli-2011 clade composed of three TiLV isolates  
169 (i.e. IL-2011-Til-2011, EC-2012, PE-2018-F3-4) from Israel, Ecuador, and Peru respectively.  
170 Additionally, the phylogenetic tree revealed 2 subclades within the Thai clade (Fig. 1). Further  
171 investigation using pairwise distance analyses, revealed that the three proposed clades diverged  
172 among each other from 0.029 to 0.044 (i.e. 2.9-4.4%), with the lowest and highest values being  
173 between Israeli-2012 & Thai clades and Israeli-2011 & Thai clades, respectively. Average  
174 divergence within Israeli-2011 clade and within Thai clade were 0.033 and 0.035 (i.e. 3.3-3.5%),  
175 respectively. The pairwise genetic distance is shown in Table S1.

#### 176 **Conserved regions of TiLV segment 1 gene sequences and primer design**

177 Segment 1 gene sequences of the 21 TiLV isolates were compared using Clustal Omega and  
178 MEGA 7 programs. Among the 21 sequences, there were 94.29-99.94 and 97.11-100% identity at  
179 the nucleotide and amino acid sequence levels, respectively. Noted that among the 17 Thai isolates,  
180 the respective percentages were 95.00-99.94 and 97.50-100%. PB domains and four RdRp motifs  
181 were detected from all of the deduced amino acid sequences (Fig. S1). Based on prediction  
182 published by Chu et al. 2012 for influenza virus and Bacharach et al. 2016 for TiLV, the four RdRp  
183 motifs of TiLV containing motif I <sup>48</sup>**TGDL**<sup>51</sup>, motif II <sup>260</sup>**CPGGMLMGMF**<sup>269</sup>, motif III  
184 <sup>282</sup>**DRFLSFSDDFIT**<sup>294</sup>, and motif IV <sup>312</sup>**CHNLSLKKS****YI**<sup>322</sup>; where bold and underlined letters  
185 represent residues matching to those of influenza virus sequences. Those specific residues were  
186 found in all 21 TiLV isolates (Fig. S1).

187 The obtained multiple nucleotide sequence alignments displayed conserved regions along segment  
188 1 gene sequences for the 21 TiLV isolates (Fig. 2). In this study, we aimed to design conserved  
189 primers to be used in a semi-nested RT-PCR assay enabling amplification of all genetic variability  
190 (known to date) of TiLV isolates if any. Primers TiLV/nSeg1F, TiLV/nSeg1R, and  
191 TiLV/nSeg1RN are 21-22 nucleotides long and locate at nucleotide positions 717-737, 1315-1336,  
192 and 1063-1083; all locate in the segment 1 ORF, showing 100% identity among all of the 21 TiLV  
193 isolates analyzed (Fig. 2). Amplicon sizes of 620 and 274 bp were expected to be produced from



194 primers TiLV/nSeg1F and TiLV/nSeg1R; and TiLV/nSeg1F and TiLV/nSeg1RN, respectively  
195 (Fig. 2). Additionally, these primer pairs were shown, *in silico*, to be TiLV specific using primer-  
196 blast tool (<https://www.ncbi.nlm.nih.gov/tools/primer-blast/>). Thus, PCR condition optimization  
197 for TiLV detection using the newly designed primers was conducted as described below.

### 198 **Development of a validated TiLV detection protocol**

199 The designed primer pairs described above were evaluated for their optimal annealing  
200 temperatures which were found to be 60°C for both first and nested amplification (figure not  
201 shown). Other parameters including numbers of cycles, buffer and primer concentration were also  
202 evaluated and optimized. Finally, our new TiLV segment 1 detection protocol was shown to be  
203 specific for only TiLV when tested against other 16 viral and bacterial pathogens (Fig. S2). The  
204 detection sensitivity assay was conducted by comparing between the present newly established  
205 TiLV segment 1 based protocol and our previous method which was based on segment 3 (Dong et  
206 al. 2017b) using serially diluted RNA from three individual TiLV-infected fish specimens. Results  
207 revealed that the new protocol described in this study was 100 times more sensitive than the  
208 previous one (Fig. 3a). This assay was done in two different laboratories i.e. 2 samples (i.e. fish 1  
209 and 2) performed in Thailand and fish 3 in WorldFish Khulna laboratory, Bangladesh. Note the  
210 presence of a ~1.1 kb band predicted to be derived from cross hybridization of the amplified  
211 products was visible at higher concentrated templates (Fig. 3a). Moreover, one set of specimens  
212 from experimentally TiLV infected fish (Table 2, set 2, n=20) obtained from our previous study  
213 (Dong et al. 2020) was assayed using both segment 1 and segment 3 based detection protocols (Fig  
214 3b), also confirming higher sensitivity of the current semi-nested PCR detection targeting TiLV  
215 segment 1 gene. This was evidenced by the numbers of positive tests obtained for segment 1 and  
216 segment 3 protocols, which were 19 and 13 out of 20, respectively (Table 2). Representative test  
217 results are shown in Fig. 3b. Comparison of TiLV infected fish samples collected from Thailand  
218 (2013-2019) and from Peru in 2018 (Tables 1 and 2) confirmed that the new detection protocol  
219 can be used to detect TiLV from all the samples tested representing Thai clade and Israeli-2011  
220 clade in this study (Fig. 4). In addition, in one population, both clinically sick fish and apparently  
221 healthy fish were all tested positive for TiLV segment 1 (Table 2, set 3). Remaining sets (Table 2,  
222 sets 4-7) from field samples subjected to the test for TiLV were all negative.



## 223 Discussion

224 Recently, Pulido et al. 2019 proposed two genetic clades of TiLV (Israeli and Thai clades) based  
225 on multilocus sequence phylogenetic analysis (MLSA) of 8,305 nucleotides of 5 TiLV genomes.  
226 Due to limited number of complete TiLV genomes available in the GenBank database, this study,  
227 therefore, aimed to explore the genetic diversity of TiLV based on the open reading frame (ORF)  
228 of segment 1 *PB1* gene (1,560 nucleotides) from 21 TiLV isolates which comprised of the isolates  
229 from Israel, Peru, Ecuador, and Thailand. Although bootstrap values were not relatively high,  
230 phylogenetic tree inferred from the segment 1 dataset indicates three separate clades (Israeli-2011,  
231 Israeli-2012, and Thai clades). It is likely that the Israeli-2012 and Thai clades evolved from the  
232 Israeli-2011 clade. However, to gain a better understanding on TiLV evolution and how the virus  
233 emerged and widespread, larger number of complete TiLV genomes or sequences of segment 1 of  
234 TiLV from a broader origin should be made available. Note that no correlation between sequence  
235 variation or phylogenetic branches and disease severity was observed in this study.

236 Comparative nucleotide sequences revealed that TiLV segment 1 is relatively well conserved with  
237 95.00-99.94% identity among all isolates used in this study, which is similar to that of  
238 Orthomyxoviruses such as Salmon isavirus RNA polymerase PB1 (97.60-99.86%) and Influenza  
239 C virus polymerase PB1 (97.12-99.34%) (BLAST search in this study). Taken together, the results  
240 from this study, suggest that TiLV segment 1 is a promising gene candidate for the study of the  
241 genetic diversity of TiLV globally.

242 Majority of tilapia farming countries are located in low and middle-income countries. In those  
243 countries, conventional PCR remains the preferable technique for many laboratories (in terms of  
244 costs and ease of use) compared to less accessible and more expensive quantitative PCR machine  
245 (Charoenwai et al. 2019). The semi-nested PCR method in this study therefore was designed based  
246 on conserved regions of genome segment 1 that was able to amplify representatives from both  
247 Thai, Israeli-2011 and Israeli-2012 clades. For its higher sensitivity and specificity, this new  
248 protocol, thus, might be able to reduce chance of false negative due to genetic variation if any.

249 Using serial dilutions of DNA plasmid containing insert of targeted TiLV segment 3 gene, our  
250 previous semi-nested RT-PCR targeting segment 3 (Dong et al. 2017b) has a detection limit of 7.5  
251 copies per reaction. Similar approaches have been used in previously reported TiLV detection  
252 protocols (Kembou Tsofack et al. 2017; Tattiyapong et al. 2018). While detection limits are based

253 on serial dilutions of DNA plasmid containing target gene, diagnostic assays in reality started from  
254 extracted RNA from infected fish, comprising both host and viral RNA. Thus, detection limit of  
255 the PCR assay for clinical samples might not be comparable with the results obtained from  
256 standard serial dilutions of DNA plasmid in the laboratory. This study, therefore, compared the  
257 sensitivity of two detection protocols together instead of using plasmid template to find out which  
258 protocol was the best for field detection purpose. Interestingly, inter-laboratory tests consistently  
259 proved that segment 1 PCR method was 100 times more sensitive than our previous segment 3  
260 PCR protocol, when assayed with RNA extracted from diseased fish samples. In this study,  
261 segment 1 PCR detection method showed no cross-amplification against a panel of extracted RNA  
262 from various bacterial and viral pathogens of freshwater fish. When applied to field samples, this  
263 new segment 1 protocol was able to detect the virus not only from clinically sick fish but also from  
264 asymptotically infected fish, indicating its potential use for screening early infected fish  
265 samples. Taken together, we recommend the use of this newly established segment 1 PCR method  
266 as an alternative tool for TiLV diagnosis and in active surveillance programs.

## 267 **Acknowledgments**

268 This study was financially funded by a research grant from National Science and Technology  
269 Development Agency (NSTDA), Thailand (P-18-52583) and partially supported by the CGIAR  
270 Research Program on Fish Agri-Food Systems (FISH) led by WorldFish.

## 271 **References**

- 272 Adams, M. J., E. L. Lefkowitz, A. M. Q. King, B. Harrach, R. L. Harrison, N. J. Kropinski, M.  
273 Krupovic, J. H. Kuhn, A. R. Mushegian, M. Nibert, S. Sabanadzovic, H. Sanfacon, S. G.  
274 Siddell, P. Simmonds, A. Varsani, F. M. Zerbini, A. E. Gorbalenya and A. J. Davison  
275 (2017). Changes to taxonomy and the international code of virus classification and  
276 nomenclature ratified by the international committee on taxonomy of viruses. *Arch*  
277 *Virology* 162: 2505-2538.
- 278 Bacharach, E., N. Mishra, T. Briese, M. C. Zody, J. E. K. Tsofack, R. Zamostiano, N. C. Toussaint,  
279 J. Ng, A. Nitido, A. Corvelo, S. C. Nielsen, M. Horning, J. Del Pozo, T. Bloom, H.  
280 Ferguson, A. Eldar and W. Lipkin (2016). Characterization of a novel orthomyxo-like virus  
281 causing mass die-offs of tilapia. *MBio* 7(2): e00431-00416.

- 282 Charoenwai, O., M. W., M. Sonthi, H. T. Dong and S. Senapin (2019). A validated semi-nested  
283 PCR for rapid detection of scale drop disease virus (SDDV) in Asian sea bass (*Lates  
284 calcarifer*). *J Virol Methods* 268: 37-41.
- 285 Chu, C., S. Fan, C. Li, C. Macken, J. H. Kim, M. Hatta, G. Neumann and Y. Kawaoka (2012).  
286 Functional analysis of conserved motifs in influenza virus PB1 protein. *PLoS ONE* 7(5):  
287 e36113.
- 288 Culley, A. I., A. S. Lang and C. A. Suttle (2003). High diversity of unknown picorna-like viruses  
289 in the sea. *Nature* 424: 1054-1057.
- 290 Culley, A. I. and G. F. Steward (2007). New genera of RNA viruses in subtropical seawater,  
291 inferred from polymerase gene sequences. *Appl. Environ. Microbiol.* 73: 5937-5944.
- 292 Dong, H. T., G. A. Ataguba, P. Khunrae, T. Rattanarojpong and S. Senapin (2017a). Evidence of  
293 TiLV infection in tilapia hatcheries from 2012 to 2017 reveals probable global spread.  
294 *Aquaculture* 479: 579-583.
- 295 Dong, H. T., V. V. Nguyen, K. Phiwsaiya, W. Gangnonngiw, B. Withyachumnarnkul, C.  
296 Rodkhum and S. Senapin (2015). Concurrent infections of *Flavobacterium columnare* and  
297 *Edwardsiella ictaluri* in striped catfish, *Pangasianodon hypophthalmus* in Thailand.  
298 *Aquaculture* 448: 142-150.
- 299 Dong, H. T., S. Senapin, W. Gangnonngiw, V. V. Nguyen, C. Rodkhum, P. P. Debnath, J. D.  
300 Deboutteville and C. V. Mohan (2020). Experimental infection reveals transmission of  
301 tilapia lake virus (TiLV) from tilapia broodstock to their reproductive organs and fertilized  
302 eggs. *Aquaculture* 515: 734541.
- 303 Dong, H. T., S. Senapin, K. Phiwsaiya, C. Techatanakitarnan, K. Dokladda, P. Ruenwongsa and  
304 B. Panijpan (2018). Histopathology and culturable bacteria associated with “big belly” and  
305 “skin nodule” syndromes in ornamental Siamese fighting fish, *Betta splendens*. *Microb  
306 Pathog.* 122: 46-52.
- 307 Dong, H. T., S. Siriroob, W. Meemetta, W. Santimanawong, W. Gangnonngiw, N. Pirarat, P.  
308 Khunrae, T. Rattanarojpong, R. Vanichviriyakit and S. Senapin (2017b). Emergence of  
309 tilapia lake virus in Thailand and an alternative semi-nested RT-PCR for detection.  
310 *Aquaculture* 476: 111-118.
- 311 Dong, H. T., C. Techatanakitarnan, P. Jindakittikul, A. Thaiprayoon, S. Taengphu, W.  
312 Charoensapsri, P. Khunrae, T. Rattanarojpong and S. Senapin (2017c). *Aeromonas jandaei*

- 313 and *Aeromonas veronii* caused disease and mortality in Nile tilapia, *Oreochromis niloticus*  
314 (L.). J. Fish. Dis. 40: 1395-1403.
- 315 Eynigor, M., R. Zamostiano, J. E. K. Tsofack, A. Berkowitz, H. Bercovier, S. Tinman, M. Lev, A.  
316 Huryitz, M. Galeotti, E. Bacharach and A. Eldar (2014). Identification of a novel RNA  
317 virus lethal to tilapia. J Clin Microbiol. 52: 4137–4146.
- 318 Ferguson, H. W., R. Kabuusu, S. Beltran, E. Reyes, J. A. Lince and J. del Pozo (2014). Syncytial  
319 hepatitis of farmed tilapia, *Oreochromis niloticus* (L.): a case report. J Fish Dis 37: 583-  
320 589.
- 321 Jansen, M. D., H. T. Dong and C. V. Mohan (2018). Tilapia lake virus: a threat to the global tilapia  
322 industry? Rev Aquacult doi:10.1111/raq.12254.
- 323 Kembou Tsofack, J. E., R. Zamostiano, S. Watted, A. Berkowitz, E. Rosenbluth, N. Mishra, T.  
324 Briese, W. I. Lipkin, R. M. Kabuusu, H. Ferguson, J. del Pozo, A. Eldar and E. Bacharach  
325 (2017). Detection of tilapia lake virus (TiLV) in clinical samples by culturing and nested  
326 RT-PCR. J. Clin. Microbiol 55: 759–767.
- 327 Koonin, E. V. and V. V. Dolja (1993). Evolution and taxonomy of positive-strand RNA viruses:  
328 implications of comparative analysis of amino acid sequences. Crit. Rev. Biochem. Mol.  
329 Biol. 28: 375-430.
- 330 Kumar, S., G. Stecher and K. Tamura (2016). MEGA7: Molecular Evolutionary Genetics Analysis  
331 version 7.0 for bigger datasets. Mol Biol Evol. 33: 1870-1874.
- 332 Nguyen, V. V., H. T. Dong, S. Senapin, N. Pirarat and C. Rodkhum (2016). *Francisella*  
333 *noatunensis* subsp. *orientalis*, an emerging bacterial pathogen affecting cultured red tilapia  
334 (*Oreochromis* sp.) in Thailand. Aquac Res 47: 3697-3702.
- 335 Nguyen, V. V., C. Rodkhum, S. Senapin and H. T. Dong (2019). Retrospective diagnosis of  
336 archived marine fish experienced unexplained mortality reveals dual infections of  
337 *Nocardia seriolae* and *Streptococcus iniae*. Aquacult Int: doi.org/10.1007/s10499-10019-  
338 00403-10494
- 339 Phusantisampan, T., P. Tattiyapong, P. Mutrakulcharoen, M. Sriariyanun and W. Surachetpong  
340 (2019). Rapid detection of tilapia lake virus using a one-step reverse transcription loop-  
341 mediated isothermal amplification assay. Aquaculture 507: 35-39.
- 342 Pulido, H. L. L., M. M. Chìo, A. L. H. Chaparro, H. T. Dong and S. Senapin (2019). Tilapia lake  
343 virus (TiLV) from Peru is genetically close to the Israeli isolates. Aquaculture x: x.

- 344 Senapin, S., H. T. Dong, W. Meemetta, W. Gangnonngiw, P. Sangsuriya, R. Vanichviriyakit, M.  
345 Sonthi and B. Nuangsaeng (2019). Mortality from scale drop disease in farmed *Lates*  
346 *calcarifer* in Southeast Asia. J Fish Dis 42: 119-127.
- 347 Senapin, S., K. Phewsaiya, M. Briggs and T. W. Flegel (2007). Outbreaks of infectious  
348 myonecrosis virus (IMNV) in Indonesia confirmed by genome sequencing and use of an  
349 alternative RT-PCR detection method. Aquaculture 266: 32-38.
- 350 Subramaniam, K., H. W. Ferguson, R. Kabuusu and T. B. Waltzek (2019). Genome sequence of  
351 tilapia lake virus associated with syncytial hepatitis of tilapia in an Ecuadorian aquaculture  
352 facility. Microbiol Resour Announc 8: e00084-00019.  
353 <https://doi.org/00010.01128/MRA.00084-00019>.
- 354 Surachetpong, W., T. Janetanakit, N. Nonthabenjawan, P. Tattiyapong, K. Sirikanchana and A.  
355 Amonsin (2017). Outbreaks of tilapia lake virus infection, Thailand, 2015–2016. Emerg  
356 Infect Dis. 23: 1031–1033.
- 357 Tajima, F. and M. Nei (1984). Estimation of evolutionary distance between nucleotide sequences.  
358 Molecular Biology and Evolution 1: 269-285.
- 359 Tattiyapong, P., K. Sirikanchana and W. Surachetpong (2018). Development and validation of a  
360 reverse transcription quantitative polymerase chain reaction for tilapia lake virus detection  
361 in clinical samples and experimentally challenged fish. J Fish Dis 41: 255-261.
- 362 Waiyamitra, P., P. Tattiyapong, K. Sirikanchana, S. Mongkolsuk, P. Nicholson and W.  
363 Surachetpong (2018). A TaqMan RT-qPCR assay for tilapia lake virus (TiLV) detection in  
364 tilapia. Aquaculture 497: 184-188.
- 365 Wangman, P., P. Chaivisuthangkura, K. Sritunyalucksana, S. Taengchaiyaphum, S. Senapin, C.  
366 Pengsuk, P. Sithigorngul and S. Longyant (2017). Development of monoclonal antibodies  
367 specific to ToxA and ToxB of *Vibrio parahaemolyticus* that cause acute hepatopancreatic  
368 necrosis disease (AHPND). Aquaculture 474: 75-81.
- 369 Yamkasem, J., Tattiyapong, P., Kamlangdee, A., Surachetpong, W. (2019) Evidence of potential  
370 vertical transmission of tilapia lake virus. J Fish Dis 42: 1293-1300.
- 371 Yin, J., Q. Wang, Y. Wang, Y. Li, W. Zeng, J. Wu, Y. Ren, Y. Tang, C. Gao, H. Hu and S. M.  
372 Bergmann (2019). Development of a simple and rapid reverse transcription–loopmediated  
373 isothermal amplification (RT-LAMP) assay for sensitive detection of tilapia lake virus. J  
374 Fish Dis 42: 817– 824.

375 **Tables and Figures**

376 **Table 1** Sources of TiLV sequences used to create the consensus segment 1 sequences in this  
 377 study

| No. | Code                 | Sample collection | Accession no. | Fish host                    | Fish health status  | Ref.                                         |
|-----|----------------------|-------------------|---------------|------------------------------|---------------------|----------------------------------------------|
| 1   | TH-2013              | Jan-2013          | MN687685      | Nile tilapia fertilized eggs | Not specified       | This study                                   |
| 2   | TH-2014              | Aug-2014          | MN687695      | Nile tilapia fry             | 90% mortality       | This study                                   |
| 3   | TH-2015              | Aug-2015          | MN687705      | Nile tilapia fingerling      | 50% mortality       | This study                                   |
| 4   | TH-2016-CN           | Dec-2016          | MN687725      | Red tilapia juvenile         | 90% mortality       | This study                                   |
| 5   | TH-2016-CU           | Dec-2016          | MN687715      | Tilapia fingerling           | 20% mortality       | This study                                   |
| 6   | TH-2017              | 2017              | MN687735      | Nile tilapia                 | 90% mortality       | This study                                   |
| 7   | TH-2018-K            | Aug-2018          | MN687755      | Nile tilapia juvenile        | 50% mortality       | This study                                   |
| 8   | TH-2018-N            | Jul-2018          | MN687745      | Red tilapia fingerling       | 40-60% mortality    | This study                                   |
| 9   | TH-2019              | Feb-2019          | MN687765      | Nile tilapia fingerling      | 30-50% mortality    | This study                                   |
| 10  | TH-2016-TV1          | Feb-2016          | KX631921      | Red tilapia                  | 20-90% mortality    | Surachetpong et al. 2017                     |
| 11  | TH-2015-TV2          | Dec-2015          | KX631931      | Red tilapia                  |                     |                                              |
| 12  | TH-2016-TV3          | Jan-2016          | KX631932      | Red tilapia                  |                     |                                              |
| 13  | TH-2016-TV4          | Jan-2016          | KX631933      | Nile tilapia                 |                     |                                              |
| 14  | TH-2016-TV5          | Jan-2016          | KX631934      | Red tilapia                  |                     |                                              |
| 15  | TH-2016-TV6          | May-2016          | KX631935      | Red tilapia                  |                     |                                              |
| 16  | TH-2016-TV7          | May-2016          | KX631936      | Nile tilapia                 |                     |                                              |
| 17  | TH-2018-WVL18053-01A | Apr-2018          | MH319378      | Nile tilapia                 | Not specified       | NCBI                                         |
| 18  | IL-2011- Til-4-2011  | 01-May-2011       | KU751814      | Tilapia                      | >80% mortality      | Eyngor et al. 2014;<br>Bacharach et al. 2016 |
| 19  | IL-2012-AD-2016      | 14-Aug-2012       | KU552131      | Hybrid tilapia               | Not specified       | NCBI                                         |
| 20  | EC-2012              | 2012              | MK392372      | Nile tilapia                 | Up to 90% mortality | Subramaniam et al. 2019                      |
| 21  | PE-2018-F3-4         | Feb-2016          | MK425010      | Nile tilapia                 | apparently healthy  | Pulido et al. 2019                           |

378 Country code: TH, Thailand, IT, Israel, EC, Ecuador, PE, Peru

379 Red tilapia (*Oreochromis* spp.); Nile tilapia (*Oreochromis niloticus*); Hybrid tilapia

380 (*Oreochromis niloticus* x *Oreochromis aureus*)

381 **Table 2** Sample sets subjected to TiLV detection using the present semi-nested RT-PCR  
 382 segment 1 protocol

|       | Fish stage                                  | Type of sample                                         | Year collected | No. of +ve/tested sample |
|-------|---------------------------------------------|--------------------------------------------------------|----------------|--------------------------|
| Set 1 | Nile and hybrid red tilapia, various stages | Archived extracted RNA from clinically sick fish       | 2013-2019      | 9/9                      |
| Set 2 | Nile tilapia, broodstock and eggs           | Experimentally TiLV infected samples                   | 2019           | 19/20*                   |
| Set 3 | Hybrid red tilapia, fingerlings             | Frozen specimens of clinically sick fish               | 2019           | 4/4                      |
|       |                                             | Frozen specimens of clinically healthy fish            | 2019           | 4/4                      |
| Set 4 | Nile tilapia, broodstock                    | Blood from apparently healthy fish preserved in Trizol | 2019           | 0/8                      |
| Set 5 | Nile tilapia, broodstock                    | Blood from apparently healthy fish preserved in Trizol | 2019           | 0/6                      |
| Set 6 | Nile tilapia, fingerlings                   | Frozen specimens of clinically healthy fish            | 2019           | 0/3                      |
| Set 7 | Nile tilapia, broodstock                    | Blood from apparently healthy fish preserved in Trizol | 2019           | 0/40                     |
|       |                                             | Liver biopsy sample preserved in Trizol                | 2019           | 0/40                     |
|       |                                             |                                                        | Total          | 36/134                   |

383 \*13/20 samples tested positive by TiLV segment 3 protocol



384 **Table 3** RNA samples used for specificity assay in this study

| Code*  | Samples                                                 | Strain      | Origin          | References                 |
|--------|---------------------------------------------------------|-------------|-----------------|----------------------------|
| S      | SDDV-infected Asian sea bass                            | 2016        | Asian sea bass  | Senapin et al. 2019        |
| V      | NNV-infected tissue                                     | G2019       | Grouper         | Laboratory archived sample |
| I      | ISKNV-infected tissue                                   | SB2019      | Asian sea bass  | Laboratory archived sample |
| N1, N2 | Clinical healthy Nile tilapia                           | NA          | Nile tilapia    | Laboratory archived sample |
| R1, R2 | Clinical healthy red tilapia                            | NA          | red tilapia     | Laboratory archived sample |
| Vo     | <i>Vogesella</i> sp.                                    | 1754        | Nile tilapia    | Laboratory strain          |
| Ps     | <i>Plesiomonas shigelloides</i>                         | NA          | Nile tilapia    | Laboratory strain          |
| Ac     | <i>Aeromonas caviae</i>                                 | 1926        | Betta fish      | Dong et al. 2018           |
| Aj     | <i>Aeromonas jandaei</i>                                | NT-01       | Nile tilapia    | Dong et al. 2017c          |
| Sa     | <i>Streptococcus agalactiae</i>                         | NA          | Nile tilapia    | Laboratory strain          |
| Ch     | <i>Chryseobacterium</i> sp.                             | 2074        | Betta fish      | Dong et al. 2018           |
| Et     | <i>Edwardsiella tarda</i>                               | VMCU06      | Nile tilapia    | Laboratory strain          |
| Vc     | <i>Vibrio cholerae</i>                                  | NA          | Nile tilapia    | Laboratory strain          |
| Si     | <i>Streptococcus iniae</i>                              | VN2396      | Asian sea bass  | Nguyen et al. 2019         |
| Ei     | <i>Edwardsiella ictaluri</i>                            | T1-1        | Striped catfish | Dong et al. 2015           |
| Av     | <i>Aeromonas veronii</i>                                | NT-03       | Nile tilapia    | Dong et al. 2017c          |
| Fc     | <i>Flavobacterium columnare</i>                         | 2846        | Asian sea bass  | Laboratory strain          |
| Fn     | <i>Francisella noatunensis</i> subsp. <i>orientalis</i> | VMCU-FNO131 | Red tilapia     | Nguyen et al. 2016         |

385 \*Code in Fig. S2

386 NA, not applicable



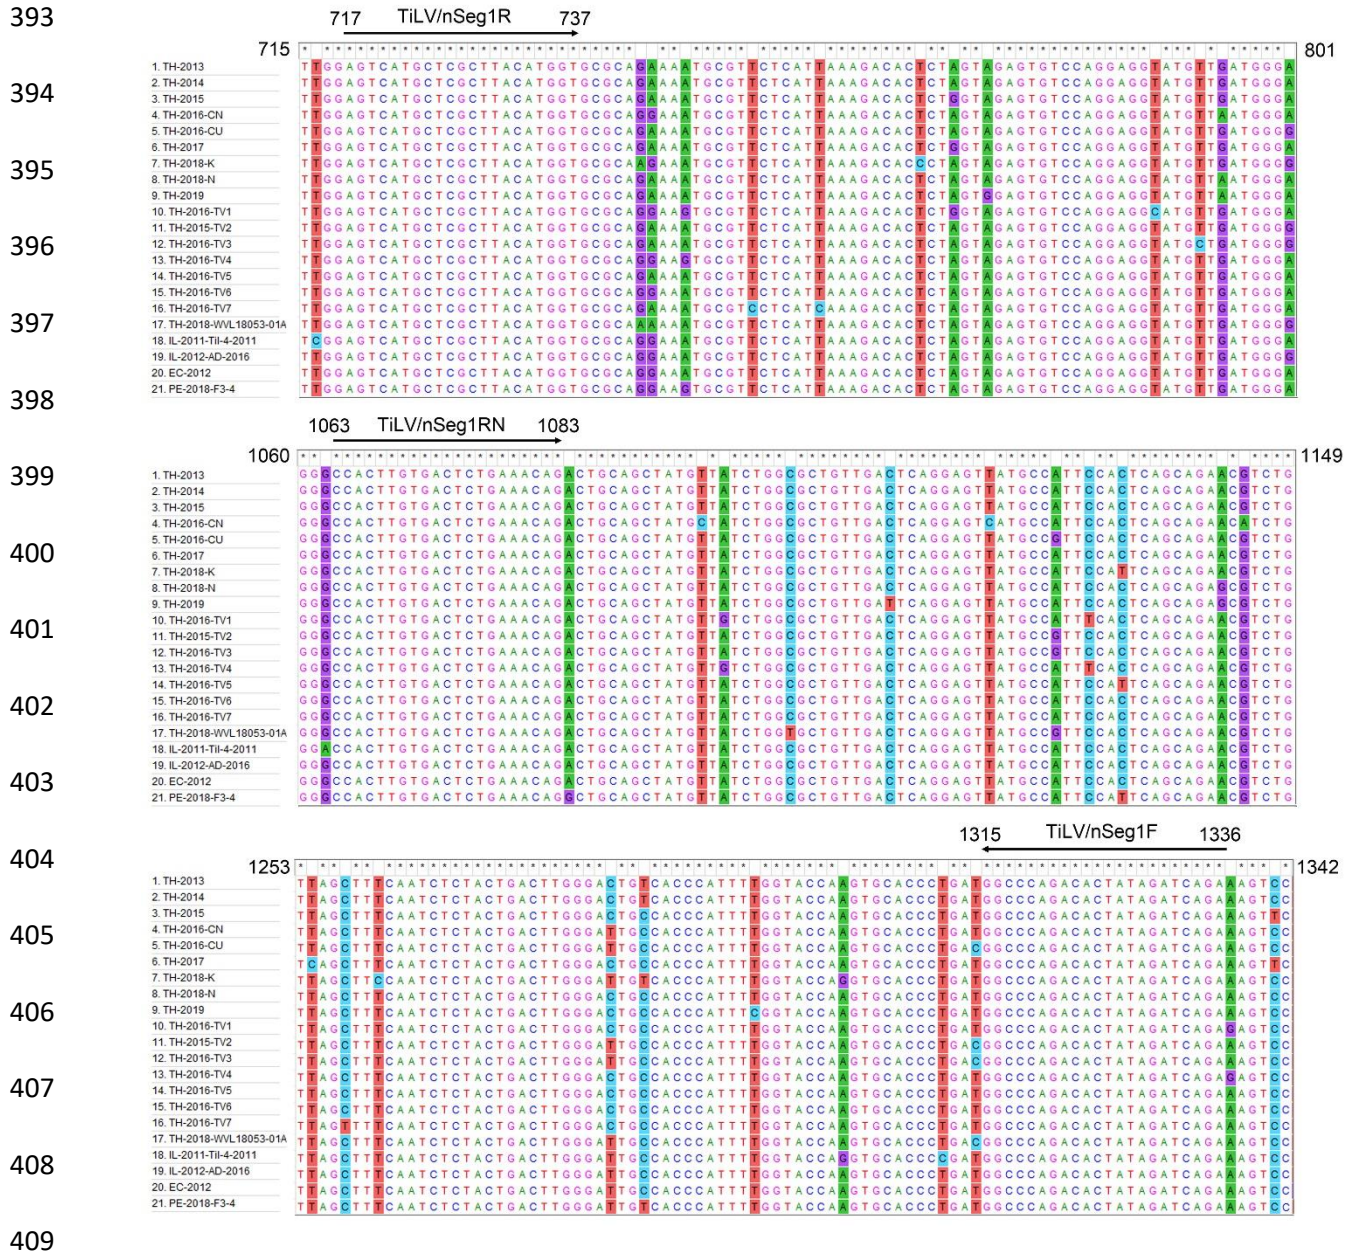

410 **Figure 2** Multiple nucleotide sequence alignments of TiLV segment 1 *PBI* genes of 21 viral  
 411 isolates. A partial portion of an alignment is shown. Numbers represent nucleotide positions of the  
 412 coding strand in the putative *PBI* ORF. Arrows indicate sites that were used to design primers for  
 413 the semi-nested RT-PCR protocol developed in this study. \* marks nucleotide identity. Columns  
 414 with differences in colors indicate nucleotide variability.



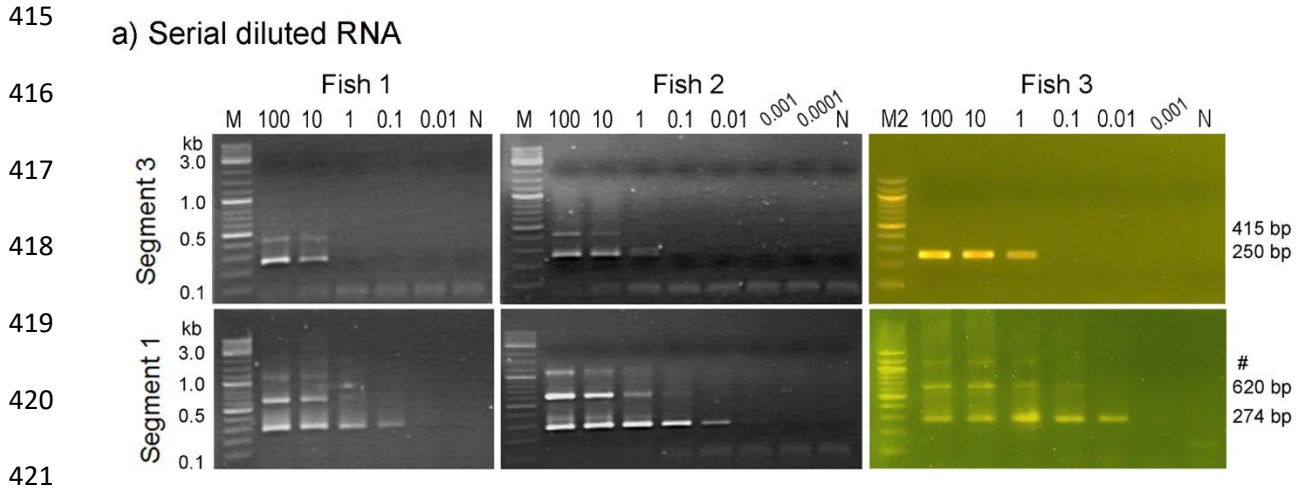

422 b) Representative comparison tests

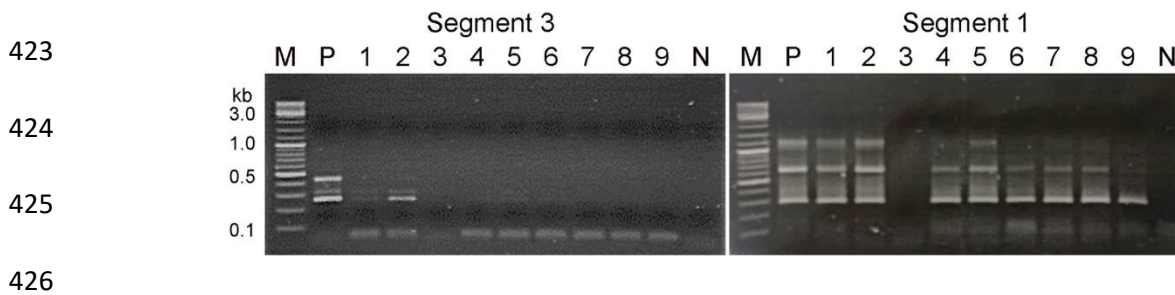

427 **Figure 3** a) Sensitivity tests of two semi-nested RT-PCR protocols (segment 1 and 3) using serial  
428 dilutions of RNA from three TiLV-infected fish. A starting 100 ng of RNA from three individual  
429 TiLV-infected fish was 10-fold serially diluted and subjected to semi-nested RT-PCR protocols  
430 using primers targeting genome segment 3 (Dong et al. 2017b) and segment 1 (this study). M, 2  
431 log DNA marker; N, no template control; #, cross hybridized PCR products. b) Representative  
432 comparison tests with 9 archived samples (1-9) obtained from Dong et al. (2020); P, positive  
433 control (infected tissue) and N, negative control (no RNA template).

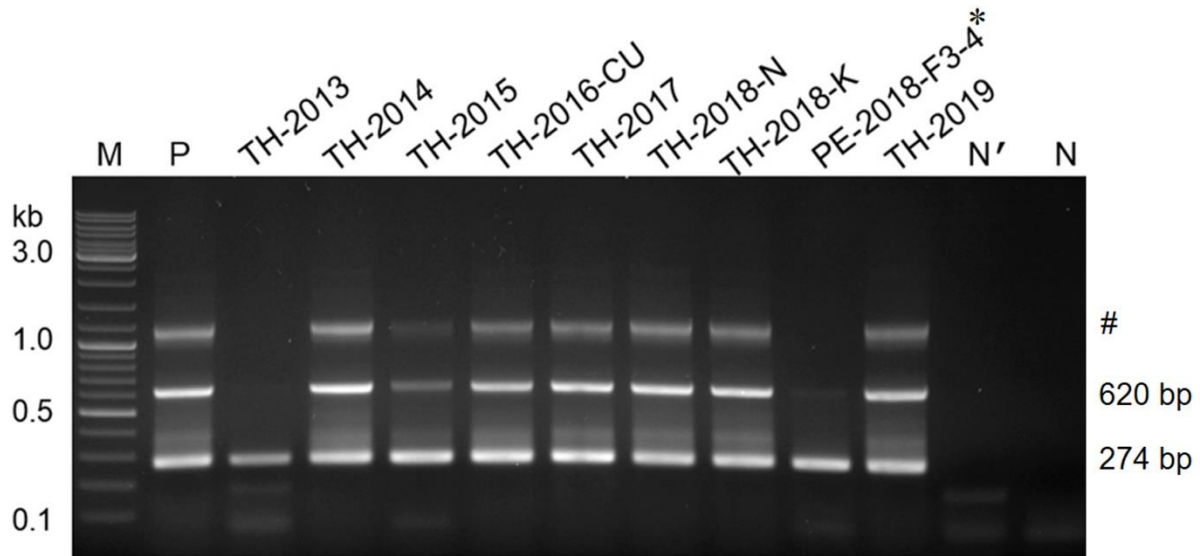

435 **Figure 4** Validation of the newly developed semi-nested RT-PCR assays in detecting TiLV  
436 segment 1 from archived samples obtained from years 2013 to 2019. \*sample from Peru described  
437 in Pulido et al. (2019); M, 2 log DNA marker; P, positive control (infected tissue); TH, samples  
438 from Thailand; PE, sample from Peru; N', non-infected fish RNA; N, no template control; #, cross  
439 hybridized PCR products.

440 **Table S1** Pairwise genetic distance between TiLV isolates and influenza virus C as outgroup. (a)  
 441 Divergence between sequences (b) Mean divergence within clades (c) Divergence between clades.  
 442 The number of base substitutions per site from between sequences are shown below diagonal.  
 443 Standard error estimate(s) are shown above the diagonal. Analyses were conducted from 1,000  
 444 bootstrap replicates using the Tajima-Nei model in MEGA 7 (Tajima and Nei 1984; Kumar et al.  
 445 2016).

446 a) Pairwise distance

| TiLV Isolate & Outgroup | 1     | 2     | 3     | 4     | 5     | 6     | 7     | 8     | 9     | 10    | 11    | 12    | 13    | 14    | 15    | 16    | 17    | 18    | 19    | 20    | 21    | 22    |
|-------------------------|-------|-------|-------|-------|-------|-------|-------|-------|-------|-------|-------|-------|-------|-------|-------|-------|-------|-------|-------|-------|-------|-------|
| 1 TH-2016-TV7           |       | 0.005 | 0.004 | 0.006 | 0.006 | 0.006 | 0.005 | 0.005 | 0.005 | 0.004 | 0.006 | 0.007 | 0.006 | 0.004 | 0.005 | 0.005 | 0.006 | 0.005 | 0.004 | 0.004 | 0.007 | 0.226 |
| 2 TH-2016-TV6           | 0.035 |       | 0.005 | 0.005 | 0.005 | 0.005 | 0.006 | 0.006 | 0.003 | 0.005 | 0.005 | 0.006 | 0.005 | 0.004 | 0.005 | 0.006 | 0.005 | 0.005 | 0.005 | 0.005 | 0.007 | 0.232 |
| 3 TH-2016-TV5           | 0.025 | 0.032 |       | 0.006 | 0.006 | 0.006 | 0.005 | 0.005 | 0.005 | 0.004 | 0.006 | 0.006 | 0.006 | 0.004 | 0.005 | 0.005 | 0.006 | 0.004 | 0.004 | 0.004 | 0.006 | 0.233 |
| 4 TH-2016-TV4           | 0.039 | 0.036 | 0.041 |       | 0.007 | 0.007 | 0.006 | 0.006 | 0.005 | 0.006 | 0.006 | 0.007 | 0.002 | 0.005 | 0.006 | 0.005 | 0.006 | 0.005 | 0.005 | 0.005 | 0.006 | 0.250 |
| 5 TH-2016-TV3           | 0.043 | 0.033 | 0.037 | 0.044 |       | 0.001 | 0.006 | 0.006 | 0.005 | 0.006 | 0.006 | 0.003 | 0.006 | 0.005 | 0.006 | 0.006 | 0.001 | 0.006 | 0.005 | 0.005 | 0.007 | 0.222 |
| 6 TH-2015-TV2           | 0.044 | 0.034 | 0.038 | 0.044 | 0.002 |       | 0.007 | 0.007 | 0.006 | 0.006 | 0.006 | 0.003 | 0.007 | 0.005 | 0.006 | 0.006 | 0.001 | 0.006 | 0.005 | 0.006 | 0.007 | 0.219 |
| 7 EC-2012               | 0.042 | 0.041 | 0.039 | 0.041 | 0.044 | 0.045 |       | 0.006 | 0.006 | 0.006 | 0.007 | 0.006 | 0.005 | 0.004 | 0.006 | 0.006 | 0.005 | 0.005 | 0.005 | 0.005 | 0.004 | 0.223 |
| 8 TH-2019               | 0.029 | 0.044 | 0.031 | 0.050 | 0.047 | 0.048 | 0.049 |       | 0.006 | 0.002 | 0.007 | 0.007 | 0.006 | 0.005 | 0.006 | 0.006 | 0.005 | 0.005 | 0.005 | 0.005 | 0.007 | 0.254 |
| 9 TH-2018-CN            | 0.043 | 0.018 | 0.041 | 0.044 | 0.042 | 0.043 | 0.047 | 0.053 |       | 0.006 | 0.006 | 0.006 | 0.005 | 0.004 | 0.005 | 0.006 | 0.005 | 0.006 | 0.005 | 0.005 | 0.006 | 0.245 |
| 10 TH-2018-N            | 0.021 | 0.035 | 0.023 | 0.041 | 0.040 | 0.041 | 0.042 | 0.008 | 0.044 |       | 0.006 | 0.007 | 0.006 | 0.005 | 0.006 | 0.005 | 0.006 | 0.004 | 0.004 | 0.004 | 0.007 | 0.247 |
| 11 TH-2018-K            | 0.042 | 0.035 | 0.036 | 0.045 | 0.041 | 0.042 | 0.045 | 0.049 | 0.043 | 0.041 |       | 0.006 | 0.007 | 0.005 | 0.005 | 0.006 | 0.006 | 0.006 | 0.006 | 0.006 | 0.007 | 0.224 |
| 12 TH-2018-WVL18053-01A | 0.048 | 0.038 | 0.041 | 0.047 | 0.010 | 0.010 | 0.049 | 0.051 | 0.047 | 0.044 | 0.045 |       | 0.007 | 0.006 | 0.007 | 0.007 | 0.002 | 0.006 | 0.006 | 0.006 | 0.008 | 0.251 |
| 13 TH-2016-TV1          | 0.041 | 0.039 | 0.043 | 0.006 | 0.046 | 0.047 | 0.044 | 0.052 | 0.047 | 0.044 | 0.049 | 0.049 |       | 0.005 | 0.006 | 0.005 | 0.006 | 0.005 | 0.005 | 0.005 | 0.006 | 0.251 |
| 14 IL-2012-AD-2016      | 0.027 | 0.026 | 0.026 | 0.032 | 0.031 | 0.032 | 0.027 | 0.036 | 0.033 | 0.027 | 0.032 | 0.036 | 0.034 |       | 0.004 | 0.005 | 0.005 | 0.004 | 0.004 | 0.004 | 0.006 | 0.220 |
| 15 IL-2011-Til-4-2011   | 0.034 | 0.032 | 0.035 | 0.038 | 0.037 | 0.038 | 0.028 | 0.044 | 0.039 | 0.035 | 0.038 | 0.044 | 0.040 | 0.023 |       | 0.005 | 0.006 | 0.004 | 0.004 | 0.004 | 0.006 | 0.231 |
| 16 TH-2017              | 0.032 | 0.039 | 0.032 | 0.039 | 0.044 | 0.045 | 0.044 | 0.041 | 0.050 | 0.032 | 0.044 | 0.049 | 0.039 | 0.032 | 0.038 |       | 0.006 | 0.002 | 0.005 | 0.005 | 0.007 | 0.231 |
| 17 TH-2016-CU           | 0.042 | 0.031 | 0.036 | 0.043 | 0.002 | 0.003 | 0.044 | 0.047 | 0.040 | 0.039 | 0.041 | 0.008 | 0.045 | 0.030 | 0.036 | 0.044 |       | 0.006 | 0.005 | 0.005 | 0.007 | 0.223 |
| 18 TH-2015              | 0.025 | 0.032 | 0.025 | 0.034 | 0.038 | 0.039 | 0.039 | 0.034 | 0.043 | 0.025 | 0.036 | 0.043 | 0.034 | 0.025 | 0.032 | 0.008 | 0.037 |       | 0.004 | 0.004 | 0.006 | 0.231 |
| 19 TH-2014              | 0.025 | 0.030 | 0.022 | 0.034 | 0.035 | 0.036 | 0.034 | 0.033 | 0.039 | 0.025 | 0.036 | 0.040 | 0.036 | 0.021 | 0.027 | 0.029 | 0.034 | 0.022 |       | 0.001 | 0.006 | 0.227 |
| 20 TH-2013              | 0.025 | 0.031 | 0.023 | 0.035 | 0.036 | 0.036 | 0.035 | 0.034 | 0.040 | 0.025 | 0.036 | 0.041 | 0.037 | 0.022 | 0.028 | 0.029 | 0.035 | 0.023 | 0.001 |       | 0.006 | 0.230 |
| 21 PE-2018-F3-4         | 0.055 | 0.056 | 0.053 | 0.052 | 0.055 | 0.056 | 0.029 | 0.082 | 0.081 | 0.056 | 0.056 | 0.081 | 0.054 | 0.043 | 0.044 | 0.053 | 0.055 | 0.047 | 0.047 | 0.047 |       | 0.223 |
| 22 Inf_C/Ann_Arbor/1/50 | 2.348 | 2.331 | 2.327 | 2.431 | 2.319 | 2.297 | 2.301 | 2.507 | 2.429 | 2.425 | 2.366 | 2.375 | 2.441 | 2.288 | 2.342 | 2.334 | 2.319 | 2.345 | 2.324 | 2.334 | 2.296 |       |

b) Within Clade Mean Distance

| Clade                | d     | SE    |
|----------------------|-------|-------|
| 1 Israeli-2011 clade | 0.033 | 0.004 |
| 2 Israeli-2012 clade | NA    | NA    |
| 3 Thai clade         | 0.035 | 0.004 |
| 4 Outgroup           | NA    | NA    |

c) Between Clade Mean Distance

| Clade                | 1     | 2     | 3     | 4     |
|----------------------|-------|-------|-------|-------|
| 1 Israeli-2011 clade |       | 0.004 | 0.004 | 0.075 |
| 2 Israeli-2012 clade | 0.03  |       | 0.003 | 0.075 |
| 3 Thai clade         | 0.044 | 0.029 |       | 0.078 |
| 4 Outgroup           | 1.147 | 1.138 | 1.171 |       |







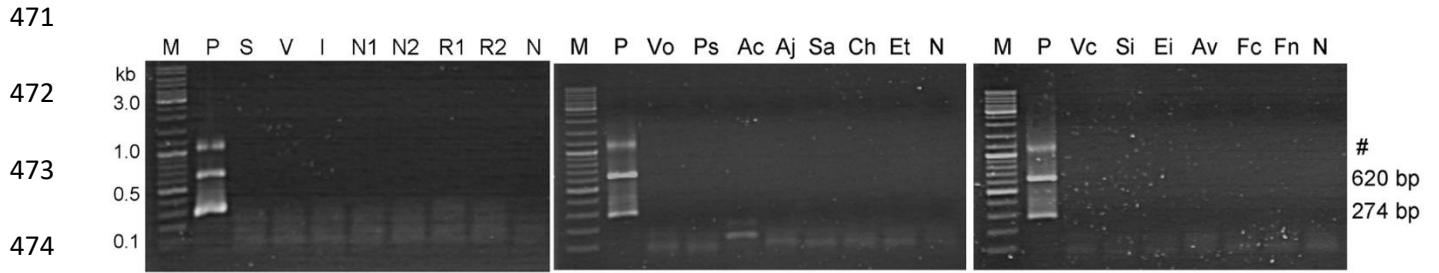

475 **Figure S2** Specificity of the semi-nested TiLV detection assays. M, 2-log DNA marker (New  
476 England Biolabs); P, positive control using RNA extracted from TiLV-infected fish tissue as  
477 template; N, no template control; S, Scale Drop Disease Virus (SDDV); V, Nervous Necrosis Virus  
478 (NNV); I, Infectious Spleen and Kidney Necrosis Virus (ISKNV); N1/N2, clinically healthy Nile  
479 tilapia; R1/R2, clinically healthy red tilapia; Vo, *Vogesella* sp.; Ps, *Pleisiomonas shigelloides*; Ac,  
480 *Aeromonas caviae*; Aj, *Aeromonas jandaei*; Sa, *Streptococcus agalactiae*; Ch, *Chryseobacterium*  
481 sp.; Et, *Edwardsiella tarda*; Vc, *Vibrio cholerae*; Si, *Streptococcus iniae*; Ei, *E. ictaluri*; Av,  
482 *Aeromonas veronii*; Fc, *Flavobacterium columnare*; Fn, *Francisella noatunensis* subsp. *orientalis*.  
483 Details of bacterial isolates are shown in Table 2.
